# Supplementary material for: GSCALite: a web server for gene set cancer analysis
Source: Oxford University Press journal article supplement (doi:10.1093/bioinformatics/bty411), 2018-05-17

Figure S1.

Gene Set

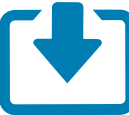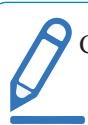

Customize Gene Set

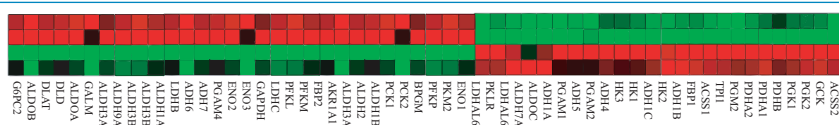

Data

TCGA cancer multi-omics data

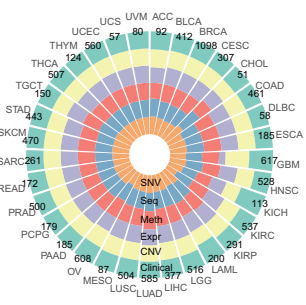

Drug Sensitivity

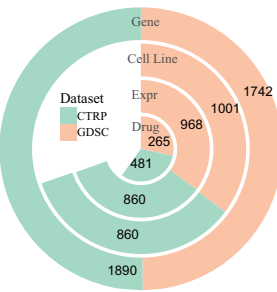

GTEx Normal Tissue

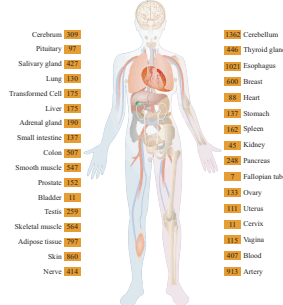

Analyze

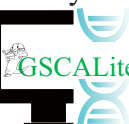

Method

Data storage

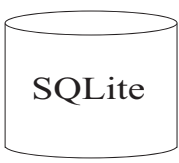

Server Infrastructure

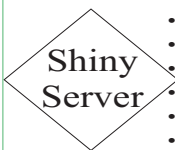

- magrittr
- shiny
- shinyjs
- shinyBS
- shinyWidgets
- shinydashboard

Analysis

- In-house script
- ggplot2
- igraph
- networkD3
- visNetwork
- maftools
- survival

Output

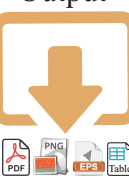

Functional Modules

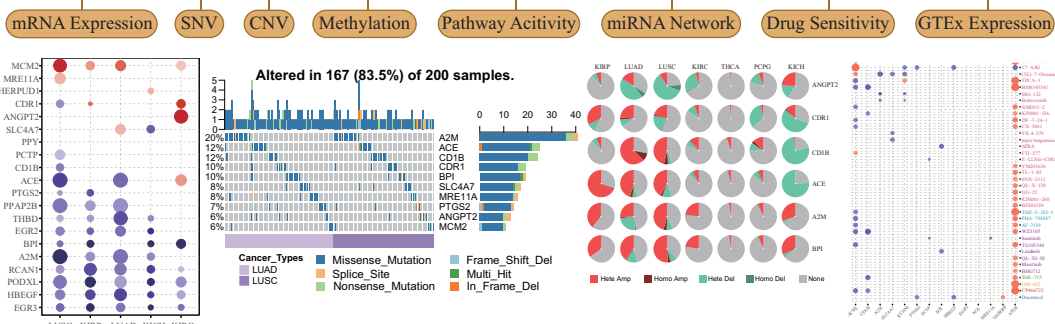

Supplement: bioinformatics_34_21_3771_s1.pdf [file bioinformatics_34_21_3771_s1.pdf]
